1 **Pericytes enable effective angiogenesis in the presence of pro-**  
2 **inflammatory signals**

3

4 Tae-Yun Kang<sup>1</sup>, Federico Bocci<sup>2,3</sup>, Mohit Kumar Jolly<sup>6</sup>, Herbert Levine<sup>7\*</sup>, José Nelson Onuchic<sup>2-</sup>  
5 <sup>5\*</sup>, Andre Levchenko<sup>1\*</sup>

6

7 <sup>1</sup>Department of Biomedical Engineering and Yale Systems Biology Institute, Yale University,  
8 New Haven, CT, USA

9 <sup>2</sup>Center for Theoretical Biological Physics, Rice University, Houston, TX, USA

10 <sup>3</sup>Department of Chemistry, Rice University, Houston, TX, USA

11 <sup>4</sup>Department of Physics and Astronomy, Rice University, Houston, TX, USA

12 <sup>5</sup>Department of Biosciences, Rice University, Houston, TX, USA

13 <sup>6</sup>Centre for BioSystems Science and Engineering, Indian Institute of Science, Bangalore, India

14 <sup>7</sup>Department of Physics, Northeastern University, Boston, MA, USA

15

16 \*To whom the manuscript related communications should be addressed

17

18

## 19 **Abstract**

20 Angiogenesis frequently occurs in the context of acute or persistent inflammation. The complex  
21 interplay of pro-inflammatory and pro-angiogenic cues is only partially understood. Using a new  
22 experimental model permitting exposure of developing blood vessel sprouts to multiple  
23 combinations of diverse biochemical stimuli and juxtacrine cell interactions, we present evidence  
24 that a pro-inflammatory cytokine, tumor necrosis factor (TNF), can have both pro- and anti-  
25 angiogenic effects, depending on the dose and the presence of pericytes. In particular, we find that  
26 pericytes can rescue and enhance angiogenesis in the presence of otherwise inhibitory high TNF  
27 doses. This sharp switch from pro- to anti-angiogenic effect of TNF observed with an escalating  
28 dose of this cytokine, as well as the effect of pericytes are explained by a mathematical model  
29 trained on the biochemical data. Furthermore, this model was predictive of the effects of diverse  
30 combinations of pro-and anti-inflammatory cues, and variable pericyte coverage. The mechanism  
31 supports the effect of TNF and pericytes as modulating signaling networks impinging in Notch  
32 signaling and specification of the Tip and Stalk phenotypes. This integrative analysis elucidates  
33 the plasticity of the angiogenic morphogenesis in the presence of diverse and potentially  
34 conflicting cues, with immediate implications for many physiological and pathological settings.

35

## 36 **Introduction**

37 Developmental and physiological processes are frequently guided by diverse, sometimes  
38 conflicting cues. These cues may reflect a complex and evolving local environment, to which the  
39 process outcomes need to be matched. For instance, angiogenesis — the growth and  
40 morphogenesis of new vascular networks from existing ones — is triggered by the disruption of  
41 the local oxygen supply, encoded at the signaling level by a host of secreted factors<sup>1, 2</sup>.

42 Angiogenesis also frequently occurs in the presence of pro-inflammatory stimuli, both acute, as in  
43 physiological wound healing, and persistent, as in the context of tumor growth and various  
44 pathologies, including asthma and chronic wounds, the local hypoxia is frequently accompanied  
45 by inflammatory conditions<sup>3, 4</sup>. Furthermore, these pro-inflammatory signals can have a direct  
46 effect on vascular stability, and the initiation and progression of angiogenesis<sup>5-7</sup>. The signaling  
47 cues in the local microenvironment can also change in time as the oxygen supply is gradually  
48 restored and as other concomitant processes, such as resolution of inflammatory response, unfold.  
49 Therefore, a proper control of vascular morphogenesis must involve a tight coordination of  
50 responses to diverse cues, including those involved in the immune response. However, in spite of  
51 decades-long research, it is not clear how this coordination is achieved and how it may be  
52 misregulated in various pathological settings, such as growing tumors, resulting in substantially  
53 altered structure and function of the vascular beds. Furthermore, the reported findings provide  
54 conflicting evidence as to whether the local inflammatory response may be pro- or anti-  
55 angiogenic<sup>5, 7-9</sup>. The complexity of the problem is further exacerbated by the intricate organization  
56 of vascular and immune systems, involving multiple cells types within highly organized cellular  
57 networks. Thus, we require new tools and approaches addressing the roles of distinct  
58 environmental and cell-generated cues in regulating angiogenesis or other complex morphogenetic  
59 processes.

60

61 Angiogenesis has been studied on diverse scales, from molecular networks to tissues, using a very  
62 diverse set of techniques. In particular, mimicking angiogenesis in various bio-engineered devices  
63 by multiple groups has allowed a careful untangling of the basic regulatory mechanisms governing  
64 this process<sup>10-12</sup>. Many of the inferred mechanisms have been confirmed *in vivo*, justifying the

65 methodology, and leading to its use in tissue engineering efforts and medical interventions.  
66 However, a degree of simplification inherent in many of these methods frequently leaves important  
67 questions open. Therefore, a continued enhancement of the tissue modeling technologies is still  
68 needed to gain a better understanding of the complex underlying biology. Arguably, these  
69 developments can also benefit from computation modeling and theoretical analysis to account for  
70 salient features of complex intracellular and intercellular molecular interactions.

71  
72 A key problem in the analysis of angiogenesis is how endothelial cells differentiate into diverse  
73 phenotypic states, including the Tip and Stalk cells<sup>8, 9, 13, 14</sup>. The Tip cells engage in locomotion  
74 within a hypoxic tissue leading the growing sprout, while Stalk cells undergo proliferation in  
75 coordination with the Tip cell locomotion to ensure the continuity of the growing sprout. These  
76 cells can undergo dynamic phenotypic switching, with some Stalk cells occasionally replacing the  
77 existing Tip cell or forming new Tip cells and spearheading new branches. Different phenotypic  
78 states can be induced by pro-angiogenic factors<sup>15</sup> with the differentiation into distinct states further  
79 enhanced in neighboring cells by juxtacrine activation of the Notch signaling pathway<sup>14</sup>. As the  
80 emerging vessel matures, a lumen forms through a partially understood set of mechanisms,  
81 involving cell remodeling and reorganization<sup>1, 16-18</sup>. Both the phenotypic state (Tip vs. Stalk)  
82 selection and lumen formation can be strongly influenced by the relevant biochemically active  
83 ligands, including key pro-angiogenic growth factors, such as Vascular Endothelial Growth Factor  
84 (VEGF) and cytokines associated with inflammation, such as Tumor Necrosis Factor (TNF)<sup>8, 9</sup>.  
85 Whereas the effects of VEGF are thoroughly explored and well understood, the interplay between  
86 VEGF and TNF signaling and the resulting effects of these potentially conflicting cues remain a  
87 matter of debate, with little information available about the crosstalk of the pathways these ligands



88 can trigger on the molecular level. Furthermore, although supportive mural cells, such as pericytes  
89 and smooth muscle cells, have been implicated in angiogenesis and maintenance of blood vessels<sup>19</sup>,  
90 <sup>20</sup>, it is not clear how they might modulate the effects of VEGF and TNF, and other relevant cues  
91 on endothelial cells.

92

93 To address the need for a better, more quantitative understanding of the crosstalk between pro-  
94 angiogenic and pro-inflammatory stimuli, here we report on development of a new meso-scale  
95 fabrication technique allowing monitoring of angiogenesis on the single cell level in the presence  
96 of diverse sets of highly controlled cues and a highly controlled pre-patterning of endothelial cells  
97 and pericytes within a collagen matrix. We used this technique to study the effect of a large number  
98 of combinations of cues, in the presence and absence of co-patterned pericytes, on angiogenesis  
99 outcomes. To account for the experimental findings and to unravel the mechanisms controlling  
100 cell differentiation in response to diverse, potentially conflicting cues, we modified and extended  
101 a previously developed mathematical model of angiogenesis to account for the effects of TNF and  
102 pericytes<sup>8</sup>. We experimentally validated the model assumptions and predictions, and showed that  
103 it can account for various unexpected effects of the complex extracellular milieu. In particular, we  
104 demonstrate that the effect of TNF can be either pro- or anti-angiogenic, depending on its  
105 concentration and the other environmental inputs. We also show that pericytes can modulate the  
106 signaling processes activated by pro-angiogenic and pro-inflammatory cues, strongly modulating  
107 the phenotypic selection at the onset of angiogenesis and rescuing anti-angiogenic effects of TNF.  
108 These findings can assist in quantitative analysis and control of angiogenesis, particularly in the  
109 presence of the inflammatory response, in normal and pathological conditions.

## 110 **Methods**

### 111 **Cell culture**

112 Human umbilical vein endothelial cells (HUVECs) were purchased from Yale Vascular Biology  
113 Center and cultured in M199 (Gibco) supplemented with 20% FBS (Life Technologies), 1%  
114 HEPES (Thermo Scientific), 1% Glutamax (Thermo Fisher), 1% antibiotic-antimycotic (Thermo  
115 Fisher), Heparin (25mg/500ml, Sigma Aldrich), and endothelial cell growth supplement (Sigma  
116 Aldrich). Human pericytes (PCs) were kindly provide by Dr. Anjelica L. Gonzalez (Yale  
117 University, CT, USA). PCs were isolated by explant outgrown from microvessels from de-  
118 identified human placenta, characterized using previously established methods<sup>21</sup>, and cultured in  
119 M199 supplemented with 10% FBS, 1% antibiotic-antimycotic. As angiogenic and inflammatory  
120 factor, VEGF (100ng/ml, Gibco) and TNF-alpha (100ng/ml, Gibco) were used, respectively. For  
121 inducing prolonged and matured vessel formation in 3D vessel chip, 40ng/ml of basic fibroblast  
122 growth factor (bFGF, Thermo Fisher), 500nM of Sphingosine-1-phosphate (S1P, Sigma Aldrich)  
123 and 75ng/ml of phorbol myristate acetate (PMA, Sigma Aldrich) were mixed along with 100ng/ml  
124 of VEGF.

125

### 126 **Biomimetic 3D Vessel fabrication**

127 The biomimetic 3D vessel chip consists of a PDMS chamber, an engineered blood vessel  
128 embedded in collagen gel and a cover slip and they were assembled without external jigs. All  
129 templates for PDMS and collagen casting were designed by SolidWorks and the cad files were  
130 converted to gcode for a commercialized 3D printer (Ultimaker) through Cura (Ultimaker). PLA  
131 filament was used for building structures. The details of the fabrication process is described in Fig.  
132 S1. Once HUVECs formed a confluent monolayer on the channel surface, fresh medium was

133 injected through the inlet hole and medium was changed every 6 hours before the treatment with  
134 pro- or anti-angiogenic factors.

135

### 136 **Co-culture of endothelial cells and pericytes**

137 Endothelial cells and pericytes were cultured with transwell inserts for 6-well plates as described  
138 in Fig. 3A. To co-culture endothelial cells and pericytes in a layered configuration, both sides of  
139 a insert membrane (Corning), which has 24mm diameter, 0.4  $\mu\text{m}$  pore size, and 10  $\mu\text{m}$  thickness,  
140 were coated with laminin (10  $\mu\text{g}/\text{ml}$ ). Pericytes were first seeded on the bottom side of the  
141 membrane and allowed to adhere for 2 hours. Then the transwell insert was placed in a 6-well plate  
142 and endothelial cells were seeded on the top side of the membrane. After overnight incubation,  
143  $\text{TNF}\alpha$  and VEGF were added on both apical and basal sides.

144

### 145 **Sandwich culture**

146 A 24-well plate was coated with 0.2 ml of collagen mixture (5mg/ml) for each well and incubated  
147 for 1 hour at 37  $^{\circ}\text{C}$  to form a collagen gel. After gelation, endothelial cells with or without pericytes  
148 were seeded on the gel and incubated at 37  $^{\circ}\text{C}$  overnight. The total cell number on a gel was set to  
149 be  $2 \times 10^5$  and the ratio of endothelial cells and pericytes was 9:1. On the following day, the  
150 culture medium was gently removed and 0.2 ml of collagen mixture was added again and incubated  
151 for 1 hour at 37  $^{\circ}\text{C}$ . After gelation, 1 ml of medium was applied with  $\text{TNF}\alpha$  or VEGF.

152

### 153 **Western blot**

154 Endothelial cells were collected with plastic scrapers carefully without damaging the membrane  
155 after PBS washing. Western blotting was used for measuring protein expression levels. Cells were

156 lysed with lysis buffer (RIPA buffer) following the manufacturer's protocol. The cell lysates were  
157 heated with Laemmli buffer at 95 °C for 5 min. Then the lysates were loaded to 4-20 % gels (Bio-  
158 Rad) for electrophoresis and proteins were transferred to a nitrocellulose membrane. The  
159 membrane was blocked with 3% BSA in TBST and incubated with primary antibodies overnight  
160 at 4 °C and followed by horseradish-peroxidase-coupled secondary antibody for 1 hour at room  
161 temperature. Between each step, the membrane was washed three times with TBST for 15min  
162 each. Finally, the membrane was incubated with ECL for revealing bands through ChemiDoc XRS  
163 (Bio-rad). The bands were quantified with ImageJ and normalized to GAPDH expression. All  
164 primary antibodies were used at 1:1000 dilution and secondary antibodies were used at 1:2000  
165 dilution. Antibodies used in western blotting are as follows: Jagged-1 (cell signaling), Dll4 (cell  
166 signaling), pNFkB (cell signaling), NFkB (cell signaling), pErk (cell signaling), Erk (cell  
167 signaling), pJNK (cell signaling), JNK (cell signaling), GAPDH (cell signaling), HRP-linked anti-  
168 rabbit (GE HealthCare), HRP-linked anti-mouse (GE HealthCare),

169

### 170 **Immunofluorescence staining**

171 For all immunofluorescence staining, cells were fixed with 4% (wt/wt) formaldehyde for 20 min,  
172 permeabilized with 0.1% triton-X for 10 min, and blocked in 10% goat serum for 1hour. All  
173 primary antibodies were used at 1:50 dilution and secondary antibodies were used at 1:100  
174 dilution. The primary and secondary antibodies used in immunofluorescence staining are as  
175 follows: VE-Cad (Santa Cruz),  $\alpha$ -SMA (Abcam), anti-mouse 488 (Thermo Scientific), anti-rabbit  
176 594 (Thermo Scientific). Hoechst and Alexa Fluor 594 phalloidin were used at 1:500 dilution  
177 and 1/200 dilution, respectively. Pre-labeling of cells were performed with Vybrant cell-labeling  
178 solution (Thermo Fisher) following the manufacturer's protocol.

179

180

### 181 **Image acquisition and analysis**

182 Sandwich culture images were acquired with 20× objective attached to phase contrast microscopy.

183 The resulting tube-like networks were quantified with Angiogenesis Analyzer for ImageJ.

184 Confocal immunofluorescence images were acquired with 20× water-immersion objective

185 attached to Leica scanning disk. Either Leica software or IMARIS was used to merge channels,

186 stack layers for 3D reconstruction and generate longitudinal and transverse cross-sections.

187 IMARIS was used to count the numbers of sprouting and to measure the length of newly formed

188 sprouts. At least two samples were prepared for each condition and the quantified data were

189 combined together.

190

### 191 **Statistical analysis**

192 Sample populations were compared using one-way ANOVA.  $P < 0.05$  was the threshold for

193 statistical significance.

194

### 195 **Mathematical model**

196 To unravel the interplay between Notch, VEGF and TNF signaling pathways, we extended the

197 mathematical model describing the interaction of Notch and VEGF developed by Boareto et al<sup>8</sup> to the

198 Notch-VEGF-TNF signaling axis. The equations and parameters are discussed in supporting information.

199 The computational analysis was performed using the Python numerical library PyDSTool<sup>22</sup>. The model

200 construction and parameters used for the model are discussed in supplementary information.

## 201 **Results**

202 To analyze the effects of different combinations of molecular pro-angiogenic and pro-  
203 inflammatory cues and of mural cells on angiogenesis, we engineered a new biomimetic system  
204 allowing precise structuring of an artificial blood vessel, with controlled juxtaposition of layers of  
205 endothelial cells and pericytes within a collagen gel (Figs. 1A-C & Fig. S1, see Methods for  
206 details). We next demonstrated that this experimental system devoid of non-biological materials  
207 enabled generation of a basement membrane separating polarized endothelial cells and abluminal  
208 pericytes, with pericyte assuming elongated morphology with processes, characteristic of the *in*  
209 *vivo* endothelial coverage (Fig. 1D). We note that, unlike other previously described blood vessel  
210 models with mural cells<sup>23-26</sup>, the major advantage of this newly developed experimental system is  
211 to enable a highly controlled juxtaposition and possible interaction between endothelial cells and  
212 pericytes from the outset of the experiment, without any additional treatment used to recruit  
213 pericytes onto endothelium from the surrounding gel. The cells were accessible to high resolution  
214 imaging modalities, including confocal microscopy, which was used throughout the experimental  
215 analysis presented here. Functionally, one of the effects of pericytes is to increase the micro-vessel  
216 stability, which is reflected in lower leakage and permeability to luminal substances. Indeed, we  
217 found that the vascular permeability of luminal FITC-dextran was decreased by 40% in the  
218 presence of pericytes vs. the pericyte-free version of the system (Figs. S2A-D).

219 To further investigate the utility of this experimental system for the analysis of angiogenesis,  
220 we supplied exogenous pro-angiogenic and pro-inflammatory cues (Fig. 1C). In particular, we  
221 delivered a previously reported<sup>11</sup> pro-angiogenic cocktail by allowing it to diffuse the collagen gel  
222 surrounding the engineered vessel. This cocktail contained VEGF supplemented with 40 ng/ml of  
223 basic fibroblast growth factor (bFGF), 500 nM of sphingosine-1-phosphate (S1P) and 75 ng/ml of

224 phorbol 12-myristate 13-acetate (PMA). We found that, with or without pericytes, within three  
225 days, this cocktail indeed triggered extensive angiogenesis resulting in multiple lumenized sprouts,  
226 extending many cell diameters from the parental vessel, frequently with multiple branches (Figs.  
227 1E-J). Notably, if 100 ng/ml of TNF was locally supplied in addition to the pro-angiogenic  
228 cocktail, in the absence of pericytes, the formation of long, lumenized sprouts was completely  
229 abolished (Figs. 1E,H). Instead, we observed the formation of single cell-sized mini-sprouts,  
230 protruding from the abluminal side of the parental vessel wall (Fig. 1F). This response suggested  
231 that 100 ng/ml of TNF had an essentially anti-angiogenic effect, perturbing a key aspect of  
232 successful luminal sprout formation. Strikingly, this anti-angiogenic effect of TNF was completely  
233 rescued if the experiment was repeated in the presence of pericytes covering the abluminal side of  
234 the engineered vessel (Figs. 1E,J). Surprisingly, we also found that many of the sprouts forming  
235 under these conditions were longer vs. those observed in the absence of TNF, suggesting an  
236 additional pro-angiogenic effect of the TNF-pericyte combination. On the other hand, the effect of  
237 pericytes on VEGF-mediated angiogenesis in the absence of TNF was relatively minor, with slight  
238 decrease of the number but not the length of the sprouts (Figs. 1E,I). Overall, these results  
239 supported the experimental assay as a controllable model of angiogenesis. More importantly, our  
240 findings revealed a complex control of angiogenesis by multiple cues presented in different  
241 combinations, with the effect of TNF strongly modulated by the presence of pericytes.

242 Due to the complex nature of the pro-angiogenic cocktail, we explored if VEGF signaling  
243 alone might interact with the cues provided by TNF and pericytes in a fashion similar to that of  
244 the whole cocktail (Figs. 2A-F). We found that, in the absence of pericytes, 100 ng/ml of VEGF  
245 alone induced a very limited but measurable effect, promoting the formation of single-cell mini-  
246 sprouts (Fig. 2A), but not the lumenized longer sprouts enabled by the full cocktail. Interestingly,

247 however, we observed that even this limited effect of VEGF was completely abrogated if 100  
248 ng/ml of TNF was also supplied to the cell environment (Fig. 2C). This result was again suggestive  
249 of anti-angiogenic effect of TNF, even in the context of a limited pro-angiogenic phenotype  
250 promoted by VEGF. We found that the effect of TNF was partially reversed in the presence of  
251 pericytes, leading to a more limited formation of mini-sprouts (Fig. 2D) vs. the effect of VEGF in  
252 the absence of pericytes and TNF (approximately two-fold lower mini-sprout formation) (Fig. 2B).  
253 The experiments also suggested that pericytes without TNF had a more pronounced inhibitory  
254 effect on VEGF-induced mini-sprout formation (number of mini-sprouts) vs. either sprout or mini-  
255 sprout formation induced by the full cocktail (Figs. 2E,F). Overall, these results supported the  
256 rescue effect that pericytes can have on the anti-angiogenic TNF signaling, even in the presence  
257 of a weak pro-angiogenic signal leading to incomplete sprout formation.

258 We also performed a more traditional vaculogenesis-mimicking assay relying on culturing  
259 cells being ‘sandwiched’ between two slabs of collagen gel (Fig. 2G). As expected, this cell culture  
260 method resulted in the characteristic mesh networks indicative of endothelial cell self-  
261 organization, thought to be reflective of conditions also leading to the vascular bed formation *in*  
262 *vivo* (Figs. 2G, S3A-H). We again found that the formation of these networks was significantly  
263 perturbed by TNF, but the inhibitory effect was rescued by the presence of pericytes (Figs. 2H &  
264 I).

265 Given the observed effects of TNF and pericytes, we next investigated the molecular  
266 mechanisms of crosstalk between pro- and anti-angiogenic cues and their modulation by  
267 pericytes. Successful angiogenesis relies on a coordinated differentiation of endothelial cells in the  
268 parental vessel into the Tip and Stalk phenotypic states. This process is regulated by activation of  
269 the Notch mediated signaling, serving, as in many other differentiation contexts, to induce different



270 cell fates in adjacent cells. Two Notch-ligands have been strongly implicated in regulation of  
271 Notch activity during angiogenesis: Delta-4 (Dll4) and Jagged-1 (Jag1)<sup>8,9,14</sup>. Furthermore, VEGF  
272 and TNF can induce the expression of Dll4 and Jag1, respectively<sup>9,27</sup>. We therefore investigated  
273 how the signaling networks specific to VEGF and TNF might interact with each other in the  
274 presence or absence of pericytes. To enable this analysis, we simplified the experimental system  
275 by culturing ECs as a monolayer, both in isolation and in co-culture with pericytes (Fig. 3A). Two  
276 types of co-culture were used. In the first, the pericytes were cultured on a porous membrane within  
277 an insert that was within the same culture medium as the endothelial cells, enabling spatial  
278 separation of the heterotypic cells, but also a possibility of paracrine interactions between them  
279 (EC/PC co-culture). In the second, the endothelial cells and pericytes were co-cultured on two  
280 sides of the same porous membrane, which enabled both contact-mediated and paracrine  
281 interactions (EC-PC co-culture). Indeed, we observed endothelial cells and pericytes making  
282 contact through the 0.4 micron pores and forming N-cadherin-rich junctions in EC-PC co-culture  
283 (Fig. 3B). The results in the above co-culture experiments were contrasted with those from an  
284 endothelial monolayer monoculture experiments (EC culture), used as a control condition.

285 We then evaluated the signaling responses to TNF or VEGF alone, or the mixture of these  
286 signals. In particular, we analyzed the phosphorylation of NF-kappaB and Erk at 10 min. following  
287 the stimulation (the time at which these pathways display a high acute activation), as these  
288 pathways are both implicated in specific responses to these ligands, and as mediating Jag1 and  
289 Dll4, respectively. We found that NF-kappaB was indeed potently activated by TNF, whereas  
290 VEGF primarily activated Erk, under all conditions (Figs 3C-E, Figs. S4A & B). Furthermore, the  
291 effect of the combination of VEGF and TNF was additive, suggesting a limited crosstalk between  
292 the signaling pathways downstream of the receptors. We then investigated the effect of pericytes

293 on the signaling outcomes. In the EC/PC co-culture, we found that pericytes had no significant  
294 effect on the phosphorylation of the signaling molecules (Figs. 3C-E), with a possible exception  
295 of JNK (Figs. S4A & B). On the other hand, in the EC-PC co-culture, there was a strong and highly  
296 significant inhibitory effect on all signaling molecules (Figs. 3C-E). These results suggested that  
297 pericytes inhibit signaling by both VEGF and TNF in a contact-dependent fashion.

298 We then explored if these short-term signaling effects could be reflected in the longer term  
299 changes in the expression levels of Jag1 and Dll4. We found, as expected, that, at 16 hrs. following  
300 exposure to signaling inputs, VEGF specifically induced an increased the expression of Dll4,  
301 whereas TNF enhanced the expression level of Jag1(Figs. 3F-H). We further observed that a  
302 combination of these ligands induced the expression of Dll4 and Jag1 to levels induced by each of  
303 the corresponding signaling inputs alone, again suggesting a very limited crosstalk between the  
304 signaling pathways. We also again did not observe a significant effect of pericytes on expression  
305 of these two molecules in the EC/PC co-culture (Figs. 3F-H). However, in the EC-PC co-culture  
306 case, we found a significant downregulation of Jag1 and Dll4 in response to TNF and VEGF inputs  
307 respectively (Figs. 3F-H). Interestingly, in spite of the additive signaling effect of the two ligands,  
308 the influence of pericytes on the combined action of TNF and VEGF in the EC-PC co-culture was  
309 much more muted, but has nevertheless resulted in a significant reduction of Jag1 levels vs. the  
310 control case (Figs. 3F-H). Overall, these results suggested that pericytes may downregulate the  
311 VEGF and TNF induced expression of Dll4 and Jag1 in endothelial cells, in a cell contact-  
312 dependent fashion, in a manner consistent with the effects of pericytes on the signaling pathways  
313 triggered by these pro- and anti-angiogenic factors. However, these results also raised the question  
314 of why the effect of pericytes in the EC-PC co-culture on expression of Dll4 was not significant.  
315 More generally, it was not clear how these molecular interactions might quantitatively translate

316 into angiogenic outcomes. We thus next sought an explanation to these questions and the  
317 angiogenic response more generally through a combination of mathematical modeling and  
318 computational analysis.

319 To further investigate the possible interplay between TNF and VEGF signaling in the presence  
320 of pericytes and its effect on the expression of Jag1 and Dll4, and, ultimately, angiogenesis, we  
321 developed a mathematical model, partially based on a previous study<sup>8</sup>. Fig. 4A shows the  
322 schematic diagram describing the interactions between Notch, VEGF and TNF signaling. VEGF  
323 and TNF are treated as extracellular input signals, whereas the intracellular signaling networks  
324 consist of three interconnected modules: the Notch module, the VEGF response module and the  
325 TNF response module. The Notch module models signaling due to the engagement of the Notch  
326 receptor by the Dll4 and Jag1 ligands, transduced by the cleaved Notch Intracellular Domain  
327 (NICD). The VEGF and TNF modules describe lumped signaling pathway activations in response  
328 to each of these ligands. These modules interact with the Notch module through a crosstalk  
329 mechanism as described below<sup>27</sup>. First, TNF induces the expression of Jag1 by activating NF-  
330 kappaB. Moreover, NCID can transcriptionally inhibit the expression of the VEGF receptor  
331 (VEGFR2)<sup>28, 29</sup>, whereas activated VEGF module (AVEGF) induces the expression of Dll4.  
332 Finally, according to the published studies<sup>29</sup>, and as captured by the previous model<sup>8</sup>, activated  
333 Notch module can suppress Dll4 transcription and induce Jag1 transcription in the same cell. These  
334 interactions have been modeled as a series of ordinary differential equations, as described more in  
335 detail in the Supporting Information. Finally, we also introduced the effect of pericytes into the  
336 model by specifying the degree to which these cells can suppress the activation of Dll4 and Jag1  
337 (Fig. 4B), based on the experimental data above (Fig. 3). Since the key phenotypic outcome  
338 regulated by these signaling pathways and controlling the initiation and progression of

339 angiogenesis is the specification of the Tip and Stalk cells in adjacent cells, we further  
340 implemented the model on the scale of two adjacent cells, focusing, in particular, on whether the  
341 signaling interactions would result in differentiation of these model cells into the divergent  
342 phenotypic states.

343 Analysis of the model revealed that cell exposure to combinations of VEGF and TNF  
344 concentrations result in diverse phenotypic responses, including the Tip phenotype (classified  
345 according to high levels of VEGFR and Dll4), the Stalk phenotype (low VEGFR, Dll4), as well as  
346 a less frequently discussed hybrid Tip/Stalk phenotype with intermediate levels of VEGFR, Dll4  
347 (Supplementary figures S5-7, see details in the Supplementary ). These results were summarized  
348 as a ‘phenotypic phase diagram’ (Fig. 4C). This diagram revealed that the degree of cellular  
349 differentiation expressed as the ratio of VEGFR activation levels in two adjacent cells increased  
350 gradually with the increasing VEGF input. This outcome was mediated by a gradual change in  
351 VEGFR activity in each of the cells (Fig. 4D). Interestingly, the model also predicted a putatively  
352 pro-angiogenic role of TNF, through promoting the Tip fate outcome, up to the threshold level  
353 (Fig. 4E). When the TNF dose exceeded this threshold level, there was a very abrupt abrogation  
354 of the cell differentiation, leading to an undifferentiated (or ‘hybrid Tip/Stalk’) state corresponding  
355 to similar levels of VEGFR activation in both of the modeled cells. This undifferentiated state of  
356 two neighboring cells was expected to disrupt effective angiogenesis, although individual cells  
357 might still adopt phenotypes promoting migration or differentiation, as described more in detail  
358 below. Overall, the model predicted that TNF-induced Notch-Jag1 signaling initially stabilizes a  
359 Tip phenotype putatively leading to pro-angiogenic responses at low doses, but prevented Notch-  
360 Dll4-driven Tip-Stalk differentiation, and thus was anti-angiogenic at higher doses, exceeding a  
361 sharp threshold. These findings were consistent with the experimentally observed anti-angiogenic

362 effect of TNF at high doses (Figs. 1E-J, 2A-F), but left open the question of whether lower doses  
363 of TNF, below the predicted threshold, would indeed be pro-angiogenic, as predicted by the model.

364 Finally, we investigated the effect of pericytes on the modeling outcomes. In the case of dense  
365 coverage, allowing both model cells to receive the pericyte input (2 bound cells in Fig. 4G), we  
366 found that, for experimentally defined parameters, pericytes could completely rescue the anti-  
367 angiogenic effect of high TNF doses (Fig. 4C,F). Since pericytes make structurally complex  
368 contacts with endothelial cells, even the complete coverage might result in differential degree of  
369 pericyte input. We thus explored the graded effect of pericytes, finding that it resulted in a  
370 progressive shift of the threshold boundary formed by the critical TNF inputs for different VEGF  
371 levels (Fig. 4G, H). Strikingly, if the coverage was incomplete, so that only one cell in the cell pair  
372 was in contact with the pericyte (1 bound cell in Fig. 4G), the effect of graded pericyte input was  
373 much more pronounced, with only a moderate change of this input leading to a strong shift of the  
374 TNF threshold and thus more pronounced pericyte-mediated rescue effect (Fig. 4I). Indeed, Notch-  
375 driven cell differentiation emerges from dynamical competition among neighbors, and partial  
376 pericyte coverage could potentially provide an additional bias to cell-fate decision<sup>30</sup>. We then  
377 sought to validate these predictions in the experimental setting modeling angiogenesis in various  
378 defined combination of VEGF and TNF ligands described in Fig. 1.

379 One of the model predictions is that TNF, by inducing Jag1, indirectly suppresses Dll4  
380 expression, consistent with prior literature reports<sup>9</sup>, which may also account for its negative effect  
381 on Tip vs. Stalk differentiation beyond a threshold level. This prediction also suggests that a  
382 combination of VEGF and TNF would exert positive and negative effects on Dll4 expression,  
383 respectively. Therefore, although both VEGF and TNF signaling may be attenuated by pericytes,  
384 when these molecular factors are present simultaneously, their attenuations can essentially cancel

385 each other and thus pericyte input might not strongly affect Dll4 expression, as indeed observed  
386 above (Figs. 4C-E, S8A-C). On the other hand, the negative pericyte effect on the expression of  
387 Jag1 would be specific to attenuation of TNF signaling only and thus would still be predicted to  
388 occur under the co-stimulation conditions, again in agreement with the experimental data (Figs.  
389 1E-J, 2A-F).

390 A more stringent test of the model can be provided by experimental exploration of the model  
391 space represented in the ‘phase diagram’ shown in Fig. 4C. To accomplish this, we exposed the  
392 cells in the 3D *angiogenesis assay described in Fig. 1* to six combinations of different  
393 concentrations of VEGF (in the presence of the pro-angiogenic cocktail components) and TNF, in  
394 the presence or absence of pericytes (Table 1). To provide a quantitative assessment of the  
395 angiogenic response (Fig. S9), we evaluated several parameters of the emerging sprouts. They  
396 included the number of branches, the sprout length (in the case of several branches, we recorded  
397 the longest distance from a branch tip of the sprout to the root of the sprout connecting it to the  
398 parental vessel), the lumenized and multicellular nature of the sprouts, as well as the number of  
399 cells which have been assigned the Tip and Stalk fates (see the Methods section for details of this  
400 analysis). Using these metrics, we found the followings.

401 Without TNF and in the absence of pericytes, in agreement with the model, the angiogenic  
402 response increased with increasing VEGF dose, yielding a greater number of lumenized sprouts,  
403 which were longer and more branched (points 1 vs. 4 in Figs. 5A,B). Also, in agreement with the  
404 model predictions, at each VEGF dose, escalating TNF levels were initially pro-angiogenic,  
405 increasing the number and branching of sprouts, as well the Tip cell formation (cf. points 1,2,3  
406 and 4,5 and Fig. 5E). However, also agreeing with the model prediction, there was a complete  
407 abrogation of the formation of lumenized sprouts beyond a critical TNF level. The strikingly

408 abrupt nature of this threshold phenomenon was underscored when cells were exposed to the  
409 combination of 100 ng/ml TNF and 100 ng/ml VEGF (the maximal amounts for both ligands used  
410 here). This was the only combination of inputs that provided two types of outcomes, varying from  
411 experiment to experiment. In two out of six independent experiments (Fig. 5C, Fig. S10A), there  
412 was an extensive formation of highly branched sprouts (point 3 in Fig. 5A), whereas in four out of  
413 six independent experiments (Fig. 5C & Fig. S10A), the lumenized sprout formation was  
414 completely shut down (denoted as point 3' in Fig. 5A). This result indicated that this combination  
415 of TNF and VEGF inputs led to a divergent outcome due to being very close to the very sharp  
416 threshold separating the pro- and anti-angiogenic effects of TNF, with the outcome defined by a  
417 slight variation of experimental conditions. This allowed us to connect this experimental point  
418 with the phenotypic phase diagrams shown in Figs. 4C,D), indicating the position of the threshold  
419 levels. The model also predicted that the threshold TNF levels would shift slightly to the lower  
420 concentration values for lower VEGF inputs (Fig. 4C,D). In agreement with this prediction, when  
421 the VEGF concentration was lowered to 10 ng/ml, while keeping TNF levels at 100 ng/ml (point  
422 6 in Fig. 5A), we observed an unambiguous and complete inhibition of lumenized sprouting in all  
423 experimental repeats (Fig. 5B). We noted that, at the TNF levels exceeding the threshold, there  
424 was still formation of single-cell mini-sprouts (Fig. 5D) and Tip cells (Fig. 5E), which however,  
425 were not supported by sprout growth through cell division and thus formation of Stalk cells (Fig.  
426 5E), thus not resulting in functional angiogenesis. Finally, we found that, phenotypically, the  
427 application of VEGF without other components of the pro-angiogenic cocktail with or without  
428 TNF (as initially analyzed in Fig. 2), was equivalent to the responses to the full pro-angiogenic  
429 cocktails with 10-fold lower VEGF contents (gray dots in Fig. 5D, and open symbols adjacent to  
430 points 4 and 6 in the diagram in Fig. 5A), suggesting that the components of the cocktail act

431 through the same molecular mechanisms in inducing angiogenic responses as those classically  
432 attributed to VEGF inputs, enhancing the VEGF signaling beyond what may be saturating levels.

433 We then experimentally examined the quantitative characteristics of the rescue effect of  
434 pericytes on angiogenesis, at TNF levels above the threshold values and different VEGF  
435 concentrations (+PC in Figs. 5B,D,E). For both VEGF concentrations, at 100 ng/ml of TNF (points  
436 3' and 6 in Fig. 5A), we observed a complete rescue of the angiogenesis, in a VEGF dependent  
437 fashion, which was consistent with the model predictions. Strikingly, at the higher VEGF input  
438 (points 1 and 3' in Fig. 5A), the effect of pericytes was not only to rescue but to enhance the  
439 angiogenesis, leading to sprouts that were much longer (data indicated as +PC:1 and +PC:3 in  
440 Figs. 5B,D,E) than those observed for any of the VEGF/TNF combinations, in the absence of  
441 pericytes. This effect was consistent with an increased formation of Stalk cells when pericytes  
442 were present along with application of the highest levels of TNF and VEGF (Fig. 5E). A closer  
443 inspection of these sprouts revealed a high degree of variability in length and in the cell density  
444 (which was also associated with the sprout thickness) (Fig. 5F). We therefore explored if this effect  
445 might be related to a variable pericyte coverage at the Tip/Stalk cell area during the sprout  
446 extension. We found that, for the condition shown as point 3 in Fig. 5A, a fraction of the sprouts  
447 was associated with a single pericyte cell at the sprout tip area. These sprouts were on average  
448 significantly longer and less dense (thinner) than the sprouts forming without a pericyte cell at the  
449 tip (Figs. 5H). However, pericytes at the sprout tip area were only very rarely observed in the  
450 absence of TNF (Fig. 5G), resulting in a more variable sprout length and cell density distributions.  
451 These data suggested that the presence of a partial pericyte coverage at the threshold combination  
452 of VEGF and TNF (points 3,3' of Fig. 5A) can substantially improve the stability of the  
453 differentiation process, leading to more persistent migration and division phenotypes and thus



454 longer sprouts. These data again supported the mechanism proposed here to explain the  
455 angiogenesis outcome at diverse combinations of TNF and VEGF inputs, validating the predictions  
456 of the associated mathematical model. Overall, our results suggested that a combination of diverse  
457 inputs of pro- and anti-angiogenic stimuli and pericyte coverage can strongly modulate the  
458 outcome of angiogenesis, resulting in wide range of shapes of incipient sprouts.

## 459 **Discussion**

461 The effect of the local inflammation and the associated cytokines on the onset and progression of  
462 angiogenesis is still a matter of debate<sup>5, 7-9</sup>. In particular, it has been shown that while TNF can  
463 show strong anti-angiogenic effects<sup>5, 7</sup>, it can also induce the Tip cell fate through upregulation of  
464 a Notch ligand Jag-1, which might result in a pro-angiogenic function<sup>8, 9, 27, 31</sup>. Here, we  
465 demonstrate, through a combination of controlled experimentation with inducible angiogenesis in  
466 an engineered system and a computational model trained on the experimental data, that these  
467 apparently contradictory findings can be reconciled within a single framework. Furthermore, this  
468 framework accounts for diverse combinatorial effects of pro-angiogenic factors, such as VEGF,  
469 and pro-inflammatory cytokines, such as TNF, modulated by unanticipated juxtacrine influence of  
470 pericytes. The mathematical model capturing the details of the signaling networks involved in  
471 specification of the Tip and Stalk cells predicted the existence of the critical TNF concentrations,  
472 above which the interactions between Dll4, Jag1 and Notch can no longer induce differentiation  
473 between neighboring endothelial cells into distinct fates, yielding instead an intermediate or hybrid  
474 state. We also note that TNF, at high levels, may have an indirect effect on Notch signaling, by  
475 loosening cell-junctions<sup>32-35</sup> and thus diminishing juxtacrine Notch receptor engagement. Lack of  
476 cell differentiation above a critical TNF level, in turn, abrogates successful sprout induction, since  
477 if a presumptive Tip cell is not supported by neighboring proliferative Stalk cells, it cannot

478 successfully migrate into the surrounding matrix without severing its contacts with the other cells.  
479 This observation is consistent with our findings of stunted single cell-sized ‘sprouts’ protruding  
480 from the parental vessel at TNF levels above the critical concentration. Likewise, if a Stalk fate  
481 induction is not supported by a neighboring Tip cell specification, the proliferative capacity  
482 inherent in the Stalk cell phenotype will be suppressed by the contact inhibition from neighboring  
483 cells within the endothelium due to the lack of Stalk cell separation from the rest of the monolayer.  
484 This is consistent with the apparent absence of Stalk cells at TNF concentrations above critical  
485 levels.

486  
487 We found that pericyte coverage can rescue the inhibitory effect of TNF on angiogenesis, due to  
488 suppression of TNF signaling in endothelial cells. Although the VEGF signaling in these cells is  
489 also inhibited by the juxtacrine effects of pericytes, the influence of pericytes on TNF signaling is  
490 more consequential, due to the properties of the thresholds, separating the pro- and anti-angiogenic  
491 effects of TNF. At almost all VEGF levels, the values of these thresholds are predicted to be  
492 effectively independent of the VEGF concentration. Therefore, suppressing VEGF signaling will  
493 have little effect on the critical TNF concentrations, although VEGF can modulate the probability  
494 of induction of Tip and Stalk cells in a dose dependent fashion, if angiogenesis proceeds<sup>15</sup>.

495  
496 The effects of pericytes on angiogenesis are predicted to strongly depend on the pericyte coverage  
497 of endothelial cells. This finding is important since pericyte coverage can vary across tissues, and  
498 between normal and cancerous vasculature, as well as be dynamic due to transient pericyte  
499 dissociation at the outset of angiogenesis<sup>20, 36, 37</sup>. For a very low pericyte coverage, the effect of  
500 TNF would be fully inhibitory, if this cytokine exceeded the critical level. On the other hand, a

501 high, uniform pericytes coverage, affecting all endothelial cells can rescue the TNF-mediated  
502 suppression of angiogenesis. More interestingly, for an intermediate pericyte coverage levels, such  
503 that for many neighboring endothelial cells only one cell in two would be in contact with a pericyte,  
504 the pericyte-mediated rescue of the inhibitory TNF effect can dramatically increase, essentially  
505 rendering TNF strongly pro-angiogenic. This effect, as predicted by the model, would occur due  
506 to an enhanced differentiation of neighboring endothelial cells, guided by a higher TNF signaling  
507 in a cell that is not in contact with a pericyte and a lower signaling in a neighboring cell in contact  
508 with a pericyte. This asymmetry in signaling, coupled with the additional differentiation mediated  
509 by Notch signaling, can enhance the Tip/Stalk fate specification and promote the emergence and  
510 maturation of the nascent sprouts. This effect was consistent with the particularly pronounced  
511 growth and branching of the sprouts under conditions (high TNF levels) otherwise inhibitory to  
512 angiogenesis in the presence of pericytes. It also was so site that with the frequent observation of  
513 a pericyte at the tip areas of the particularly long sprouts, suggesting that the Tip/Stalk fate  
514 selection may be stabilized by a combination of a partial pericyte coverage and TNF, not only  
515 during the onset of sprout extension, but also during the sprout growth. Overall, our integrative  
516 analysis suggests an unexpected conclusion that angiogenesis can be particularly enhanced,  
517 leading to longer and more branched blood vessels, at relatively high ambient TNF levels in the  
518 presence of partial coverage by pericytes.

519  
520 These findings are interesting to put into the context of the other commonly accepted views on the  
521 functions of pericytes within the existing vascular beds. Low and intermediate pericyte coverage  
522 has been suggested to result in lower stability and higher leakage of blood vessels, which might be  
523 an indication of either pathologic conditions (e.g., in the context of growing tumors) or

524 dynamically re-organizing vasculature. This view is consistent with our observations, suggesting  
525 that high pericyte coverage can down-modulate the effects of TNF and possibly other relevant  
526 signaling inputs, thus protecting the cells from the environmental stimuli, which may otherwise  
527 decrease the stability of the vessel. The destabilizing effect of low pericyte coverage can in part  
528 reflect a more variable effective sensitivity of endothelial cells to various extracellular stimuli,  
529 leading to more extensive angiogenesis, which might not however result in optimal functionality,  
530 unless pericyte coverage can be recovered through recruitment or differentiation of precursor cells.

531  
532 *In vivo*, the local microenvironment can be highly dynamic. In particular, successful angiogenesis  
533 might lead to a gradual restoration of appropriate oxygen tension and also be accompanied by a  
534 progressive inflammation resolution. As these conditions evolve, the biochemical milieu may  
535 change along with dynamic alterations of inputs from mural cells, such as pericytes, raising the  
536 question of how the resulting morphogenesis of vascular beds might be affected. Our analysis  
537 provides a useful framework that can help start analyzing the complex multi-factorial control of  
538 this morphogenetic process critical in a variety of developmental and physiological settings. More  
539 generally, it can also provide an insight into how heterotypic cell interactions can also modulate  
540 Notch signaling in other contexts, regulating cellular differentiation outcomes.

541

542 **References:**

- 543 1. Adams, R.H. & Alitalo, K. Molecular regulation of angiogenesis and  
544 lymphangiogenesis. *Nat Rev Mol Cell Biol* **8**, 464-478 (2007).
- 545 2. Potente, M., Gerhardt, H. & Carmeliet, P. Basic and therapeutic aspects of  
546 angiogenesis. *Cell* **146**, 873-887 (2011).
- 547 3. Albini, A. & Sporn, M.B. The tumour microenvironment as a target for  
548 chemoprevention. *Nat Rev Cancer* **7**, 139-147 (2007).
- 549 4. Eming, S.A., Krieg, T. & Davidson, J.M. Inflammation in wound repair: molecular and  
550 cellular mechanisms. *J Invest Dermatol* **127**, 514-525 (2007).
- 551 5. Sainson, R.C. et al. TNF primes endothelial cells for angiogenic sprouting by inducing  
552 a tip cell phenotype. *Blood* **111**, 4997-5007 (2008).
- 553 6. Madge, L.A. & Pober, J.S. TNF signaling in vascular endothelial cells. *Exp Mol Pathol*  
554 **70**, 317-325 (2001).
- 555 7. Frater-Schroder, M., Risau, W., Hallmann, R., Gautschi, P. & Bohlen, P. Tumor necrosis  
556 factor type alpha, a potent inhibitor of endothelial cell growth in vitro, is angiogenic in  
557 vivo. *Proc Natl Acad Sci U S A* **84**, 5277-5281 (1987).
- 558 8. Boareto, M., Jolly, M.K., Ben-Jacob, E. & Onuchic, J.N. Jagged mediates differences in  
559 normal and tumor angiogenesis by affecting tip-stalk fate decision. *Proc Natl Acad Sci*  
560 *U S A* **112**, E3836-3844 (2015).
- 561 9. Benedito, R. et al. The Notch Ligands Dll4 and Jagged1 Have Opposing Effects on  
562 Angiogenesis. *Cell* **137**, 1124-1135 (2009).
- 563 10. Chen, M.B. et al. On-chip human microvasculature assay for visualization and  
564 quantification of tumor cell extravasation dynamics. *Nat Protoc* **12**, 865-880 (2017).
- 565 11. Nguyen, D.H. et al. Biomimetic model to reconstitute angiogenic sprouting  
566 morphogenesis in vitro. *Proc Natl Acad Sci U S A* **110**, 6712-6717 (2013).
- 567 12. Bayless, K.J., Kwak, H.I. & Su, S.C. Investigating endothelial invasion and sprouting  
568 behavior in three-dimensional collagen matrices. *Nat Protoc* **4**, 1888-1898 (2009).
- 569 13. Jakobsson, L. et al. Endothelial cells dynamically compete for the tip cell position  
570 during angiogenic sprouting. *Nat Cell Biol* **12**, 943-953 (2010).
- 571 14. Bentley, K. et al. The role of differential VE-cadherin dynamics in cell rearrangement  
572 during angiogenesis. *Nat Cell Biol* **16**, 309-321 (2014).
- 573 15. Noren, D.P. et al. Endothelial cells decode VEGF-mediated Ca<sup>2+</sup> signaling patterns to  
574 produce distinct functional responses. *Sci Signal* **9**, ra20 (2016).
- 575 16. Eilken, H.M. & Adams, R.H. Dynamics of endothelial cell behavior in sprouting  
576 angiogenesis. *Curr Opin Cell Biol* **22**, 617-625 (2010).
- 577 17. Hoang, M.V., Whelan, M.C. & Senger, D.R. Rho activity critically and selectively  
578 regulates endothelial cell organization during angiogenesis. *Proc Natl Acad Sci U S A*  
579 **101**, 1874-1879 (2004).
- 580 18. Bryan, B.A. et al. RhoA/ROCK signaling is essential for multiple aspects of VEGF-  
581 mediated angiogenesis. *Faseb J* **24**, 3186-3195 (2010).
- 582 19. Gerhardt, H. & Betsholtz, C. Endothelial-pericyte interactions in angiogenesis. *Cell*  
583 *Tissue Res* **314**, 15-23 (2003).

- 584 20. Bergers, G. & Song, S. The role of pericytes in blood-vessel formation and  
585 maintenance. *Neuro Oncol* **7**, 452-464 (2005).
- 586 21. Maier, C.L., Shepherd, B.R., Yi, T. & Pober, J.S. Explant outgrowth, propagation and  
587 characterization of human pericytes. *Microcirculation* **17**, 367-380 (2010).
- 588 22. Clewley, R. Hybrid models and biological model reduction with PyDSTool. *PLoS*  
589 *Comput Biol* **8**, e1002628 (2012).
- 590 23. Herland, A. et al. Distinct Contributions of Astrocytes and Pericytes to  
591 Neuroinflammation Identified in a 3D Human Blood-Brain Barrier on a Chip. *PLoS One*  
592 **11**, e0150360 (2016).
- 593 24. Campisi, M. et al. 3D self-organized microvascular model of the human blood-brain  
594 barrier with endothelial cells, pericytes and astrocytes. *Biomaterials* **180**, 117-129  
595 (2018).
- 596 25. Kim, J. et al. Engineering of a Biomimetic Pericyte-Covered 3D Microvascular  
597 Network. *PLoS One* **10**, e0133880 (2015).
- 598 26. Lee, E. et al. A 3D in vitro pericyte-supported microvessel model: visualisation and  
599 quantitative characterisation of multistep angiogenesis. *J Mater Chem B* **6**, 1085-1094  
600 (2018).
- 601 27. Johnston, D.A., Dong, B. & Hughes, C.C. TNF induction of jagged-1 in endothelial  
602 cells is NFkappaB-dependent. *Gene* **435**, 36-44 (2009).
- 603 28. Thurston, G. & Kitajewski, J. VEGF and Delta-Notch: interacting signalling pathways in  
604 tumour angiogenesis. *Br J Cancer* **99**, 1204-1209 (2008).
- 605 29. Selvam, S., Kumar, T. & Fruttiger, M. Retinal vasculature development in health and  
606 disease. *Prog Retin Eye Res* **63**, 1-19 (2018).
- 607 30. Shaya, O. & Sprinzak, D. From Notch signaling to fine-grained patterning: Modeling  
608 meets experiments. *Curr Opin Genet Dev* **21**, 732-739 (2011).
- 609 31. Petrovic, J. et al. Ligand-dependent Notch signaling strength orchestrates lateral  
610 induction and lateral inhibition in the developing inner ear. *Development* **141**, 2313-  
611 2324 (2014).
- 612 32. Dewi, B.E., Takasaki, T. & Kurane, I. In vitro assessment of human endothelial cell  
613 permeability: effects of inflammatory cytokines and dengue virus infection. *J Virol*  
614 *Methods* **121**, 171-180 (2004).
- 615 33. Aveleira, C.A., Lin, C.M., Abcouwer, S.F., Ambrosio, A.F. & Antonetti, D.A. TNF-alpha  
616 signals through PKCzeta/NF-kappaB to alter the tight junction complex and increase  
617 retinal endothelial cell permeability. *Diabetes* **59**, 2872-2882 (2010).
- 618 34. Shaya, O. et al. Cell-Cell Contact Area Affects Notch Signaling and Notch-Dependent  
619 Patterning. *Dev Cell* **40**, 505-511 e506 (2017).
- 620 35. Clark, P.R., Kim, R.K., Pober, J.S. & Kluger, M.S. Tumor necrosis factor disrupts claudin-  
621 5 endothelial tight junction barriers in two distinct NF-kappaB-dependent phases.  
622 *PLoS One* **10**, e0120075 (2015).
- 623 36. Zhang, L. et al. Presence of retinal pericyte-reactive autoantibodies in diabetic  
624 retinopathy patients. *Sci Rep* **6**, 20341 (2016).
- 625 37. Huang, F.J. et al. Pericyte deficiencies lead to aberrant tumor vascularization in the  
626 brain of the NG2 null mouse. *Dev Biol* **344**, 1035-1046 (2010).

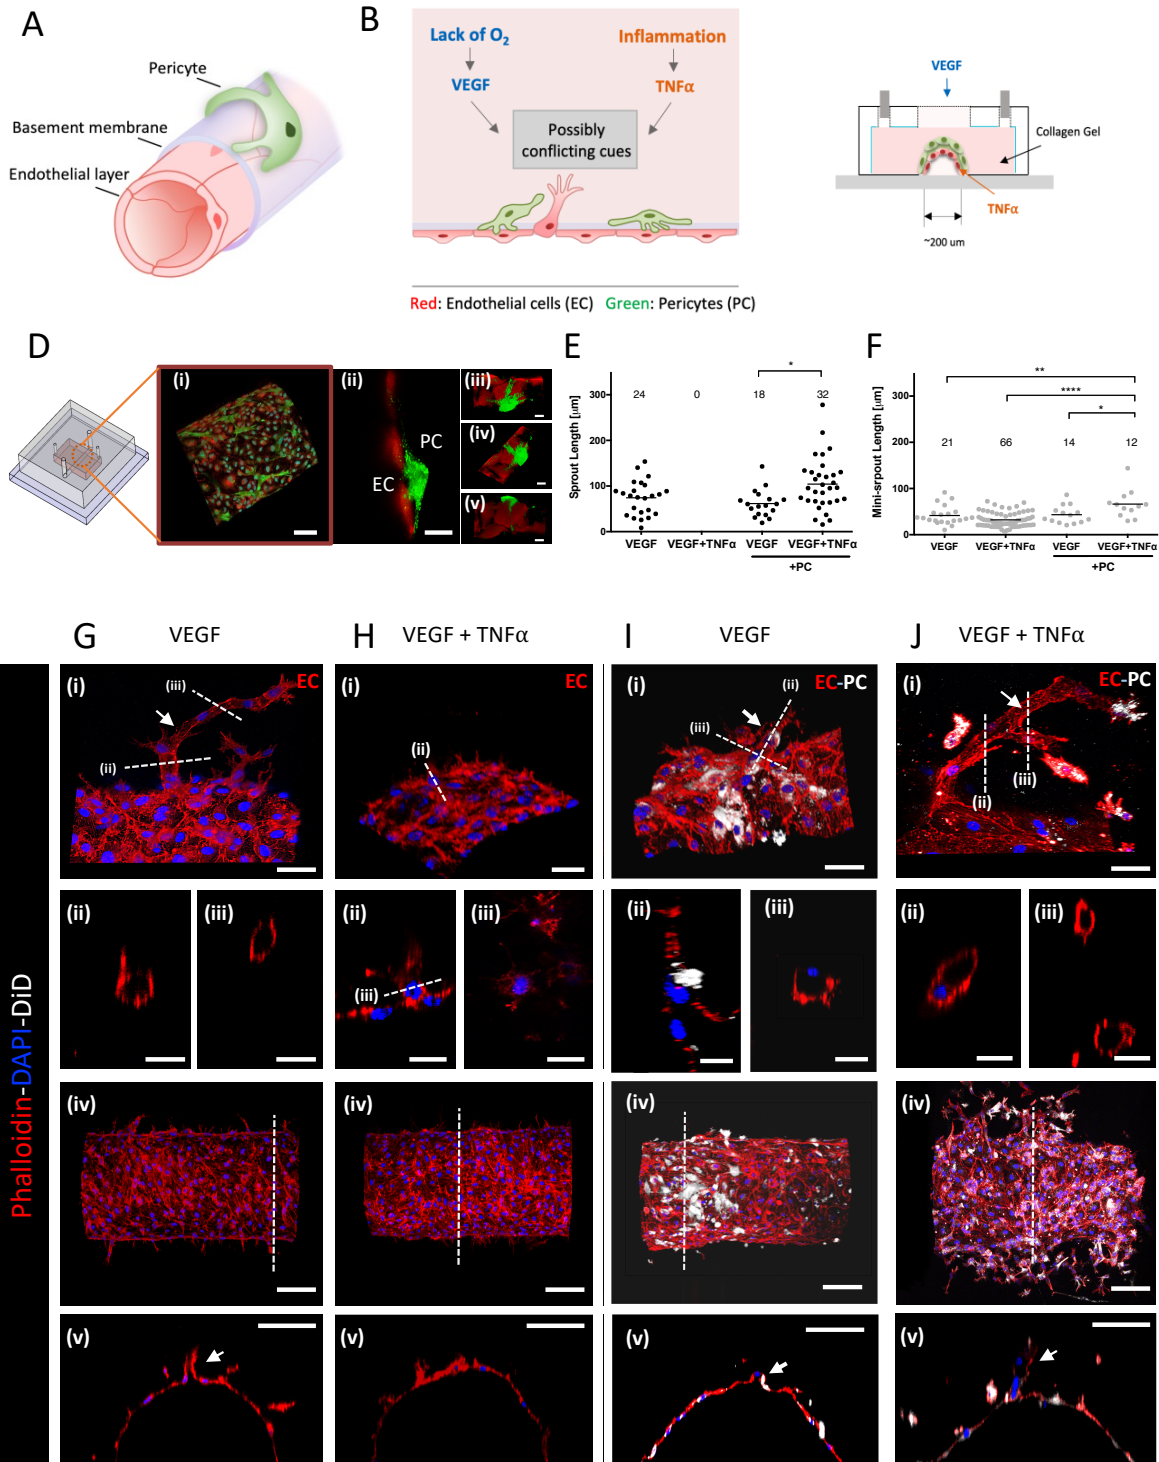

627

628 **Figure 1. 3D vessel on a chip effectuating the interaction between endothelium and pericytes.**

629 (A) Layered structure of a capillary vessel: endothelium, basement membrane, and pericytes. (B)



630 Schematic description of angiogenesis co-stimulated by cues from inflammation and ischemic  
631 tissue. This study focuses on how those possibly conflicting cues control angiogenesis in multi-  
632 cellular vessel structure. (C) Schematic diagram of 3D vessel on a chip mimicking the organization  
633 of capillary vessel embedded in collagen type I. (D) Confocal images of endothelial cells (red) and  
634 pericytes (green): (i-ii) Endothelial cells formed a monolayer on the channel and pericytes were  
635 covering the endothelium in close proximity. Scale bar, 100  $\mu m$ . (iii-v) Basal sides of endothelial  
636 cells and pericytes were facing each other. Scale bar, 20  $\mu m$ . Quantified lumenized sprouts (E)  
637 and single cell-sized mini-sprouts (F) from angiogenesis assay on the 3D vessel on a chip.  
638 Confocal images of lumenized sprouts formation in response to gradient of VEGF (G), single cell-  
639 sized mini-sprouts formation in response to gradient of VEGF and local TNF $\alpha$  (H), shorter sprouts  
640 in response to gradient of VEGF in the presence of pericyte (I), the rescued sprout formation in  
641 response to gradient of VEGF and local TNF $\alpha$  in the presence of pericytes (J). Actin filaments of  
642 endothelial cells and pericytes were stained with phalloidin (red) and pericytes were pre-labeled  
643 with DiD (white). White arrows in (G, ii-iii), (I, ii-iii) and (J, ii-iii) indicate sprouts with hollow  
644 lumens. Scale bar, 50  $\mu m$  in (i), 25  $\mu m$  in (ii) & (iii), 100  $\mu m$  in (iv) & (v) of G-J. Cocktail medium  
645 was used as a basal medium for all samples.



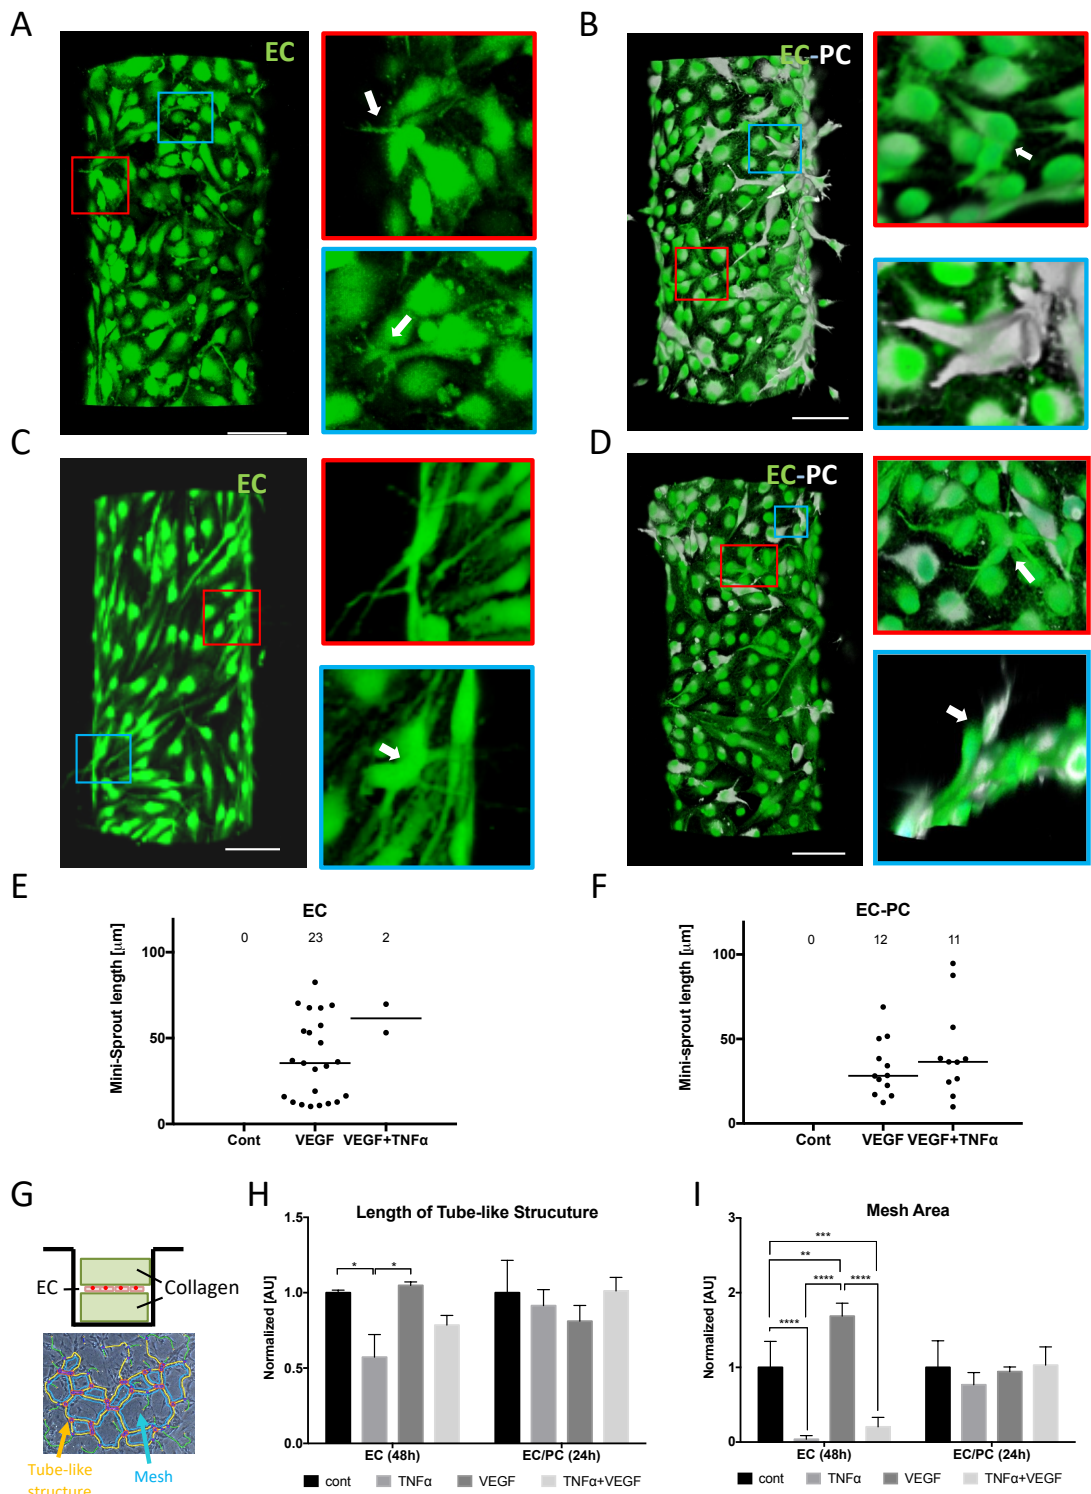

646

647 **Figure 2. Interplay of TNFα and VEGF on initiation of angiogenesis and its alteration by**

648 **pericytes. Representative images of mini-sprouts formation and cell migration induced by VEGF**

649 without (A) and with (B) pericytes. Inhibited mini-sprouts formation by TNF $\alpha$  without pericytes  
650 (C) and rescued mini-sprouts formation by pericytes (D). GFP-tagged endothelial cells (green) and  
651 DiD pre-labeled pericytes (white). Scale bar, 100  $\mu m$ . White arrows indicate single-cell mini-  
652 sprouts which are the limited angiogenic response in normal growth medium without any  
653 supplement. Quantification of mini-sprouts formation without (E) and with (F) pericytes. (G)  
654 Experimental setup for vasculogenesis assay. Endothelial monolayer was cultured between two  
655 collagen layers and TNF $\alpha$  and VEGF were added with normal culture medium. Total length of  
656 tube-like structure (H) and mesh area (I) were significantly inhibited by TNF $\alpha$  on EC monolayer,  
657 while the difference was diminished in EC/PC mixed monolayer.  
658

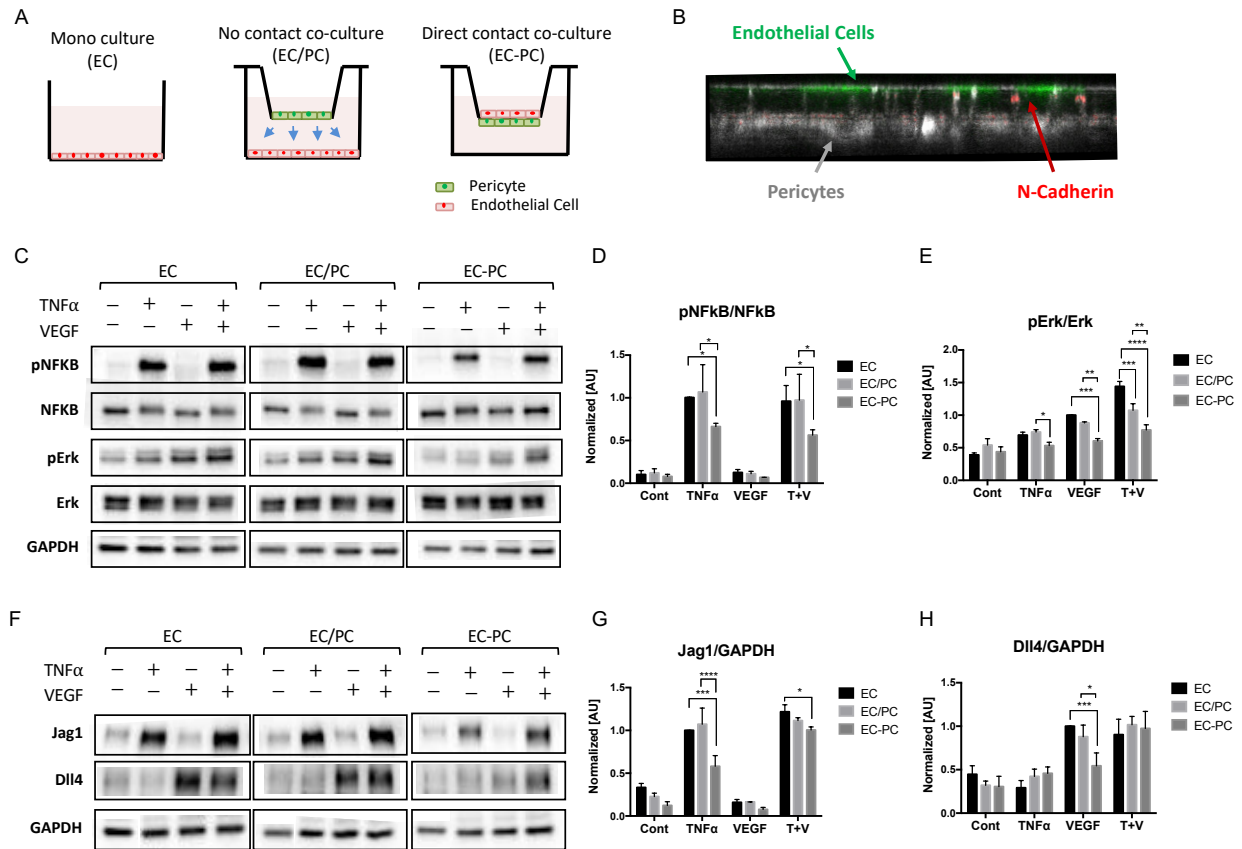

659

660

661

662

663

664

665

666

667

668

669

**Figure 3. Inhibition TNF $\alpha$  and VEGF mediated signaling pathways on endothelium in a pericyte contact-dependent fashion.** (A) Experimental setup for mono culture (EC), no contact co-culture (EC/PC), and direct contact co-culture (EC-PC) of ECs and PCs using transwell inserts. (B) ECs (green) and PCs (white) sitting across a permeable membrane. ECs and PCs are making N-cadherin (red) adhesion through pores of the transwell membrane. (C) Phosphorylation levels of TNF $\alpha$  and VEGF downstream targets analyzed by western blots. The bar graphs of pNFkB/NFkB (D) and pErk/Erk (E) were quantified from blot images (n=3). (F) Notch ligand Jag1 and Dll4 expression analyzed by western blots. The bar graphs of Jag1/GAPDH (G) and Dll4/GAPDH (H) were quantified from the blot images (n=3). Pericytes downregulated the downstream of VEGF and TNF in endothelial cells, in a cell contact-dependent fashion.

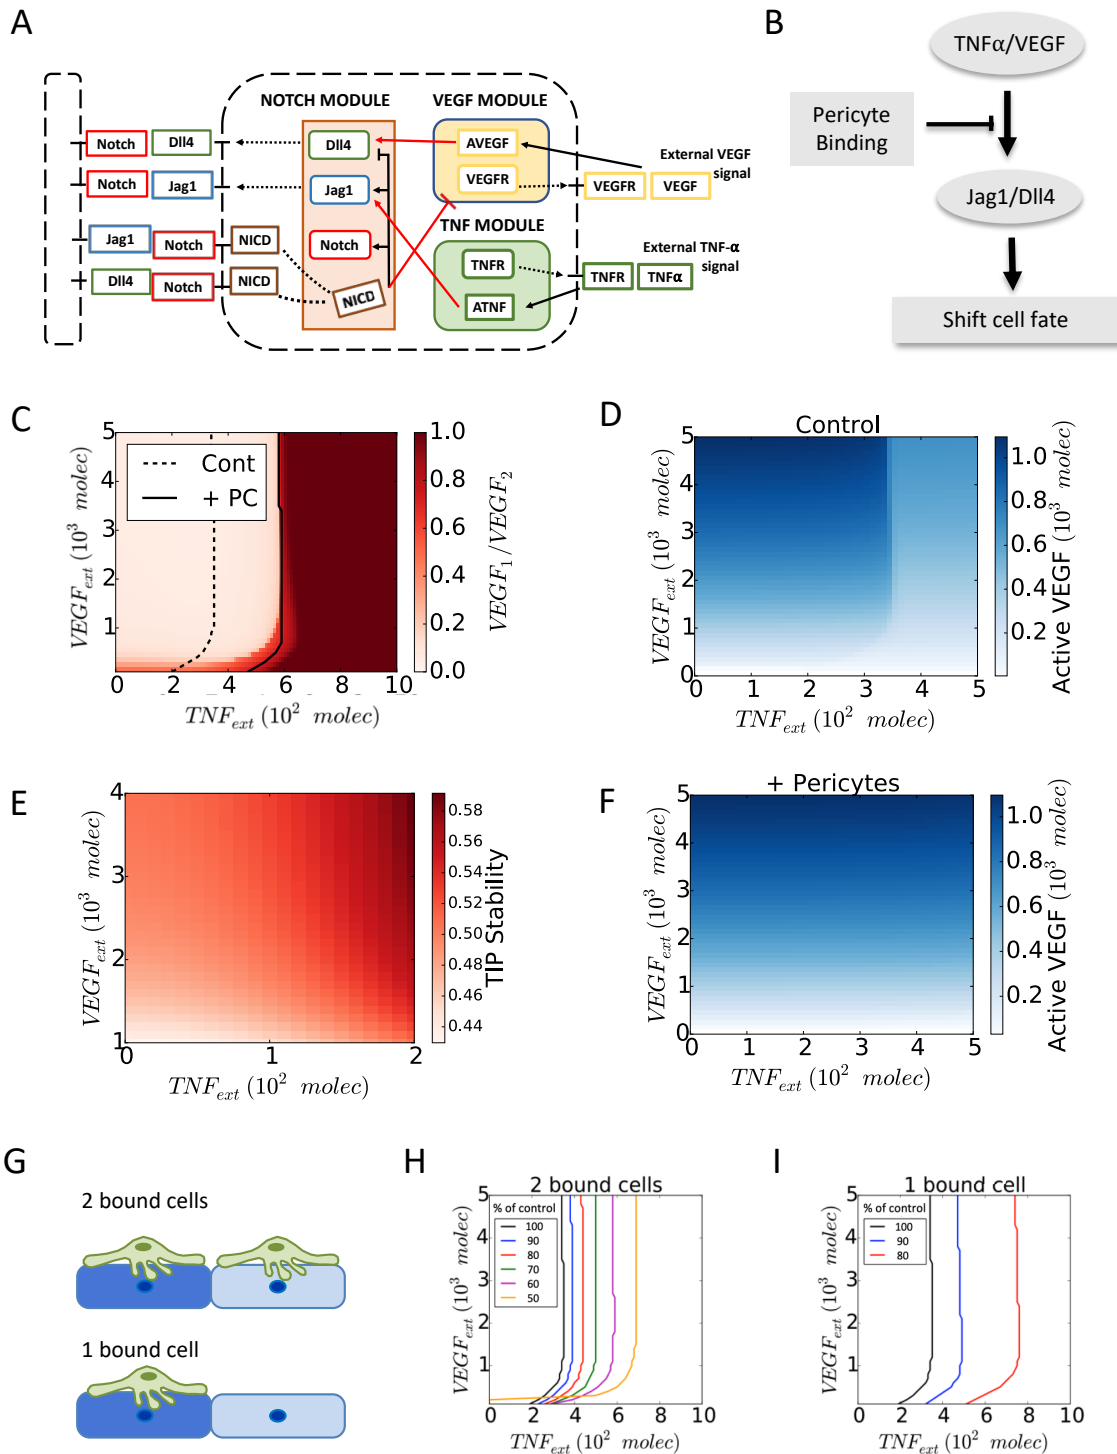

670

671 **Figure 4. Pericytes shift the transition line between two distinct tip-stalk fate decision phases**

672 **of endothelial cells.** (A) Schematic diagram of the connections between Notch, VEGF and TNF $\alpha$

673 signaling. Red arrows highlight the crosstalk between the three components. Notch Intra Cellular

674 Domain (NICD) transcriptionally inhibits VEGF receptor (VEGFR), while activated VEGF  
675 signaling (AVEGF) induces Dll4). Similarly, activated TNF $\alpha$  signaling (ATNF) induces Jagg1.  
676 (B) Schematic summary of the role of pericyte binding on notch signaling pathway and cell fate  
677 decision in angiogenesis. (C) Phase diagram of the relative VEGF activity in a 2-cell system for  
678 different levels of external TNF $\alpha$  (x-axis,  $TNF_{ext}$ ) and VEGF (y-axis,  $VEGF_{ext}$ ) signal. Pericytes  
679 slightly modify the action of external VEGF while inhibiting completely the effect of external  
680 TNF $\alpha$ . (D) Heat map of the level of active VEGF signaling in one of the two cells in bare  
681 endothelium. (E) The stability of the Tip cells by of external TNF $\alpha$  and VEGF (see Fig. S8 for  
682 details on calculation). (F) Heat map of the level of active VEGF signaling in one of the two cells  
683 in the presence of pericytes. (G) Description of 2 bound cells system and 1 bound cell system.  
684 Green cells and blue cells indicate pericytes and endothelial cells, respectively. Variation of the  
685 transition line upon the strength of inhibitory effect of pericytes in 2 bound cells system (H) and 1  
686 bound cell system (I). As the value of p decreases, the transition line shifts further toward higher  
687 external TNF $\alpha$  signal. The value of p represents the percentage of Dll4 and Jag1 expression  
688 reduced by pericytes.  
689

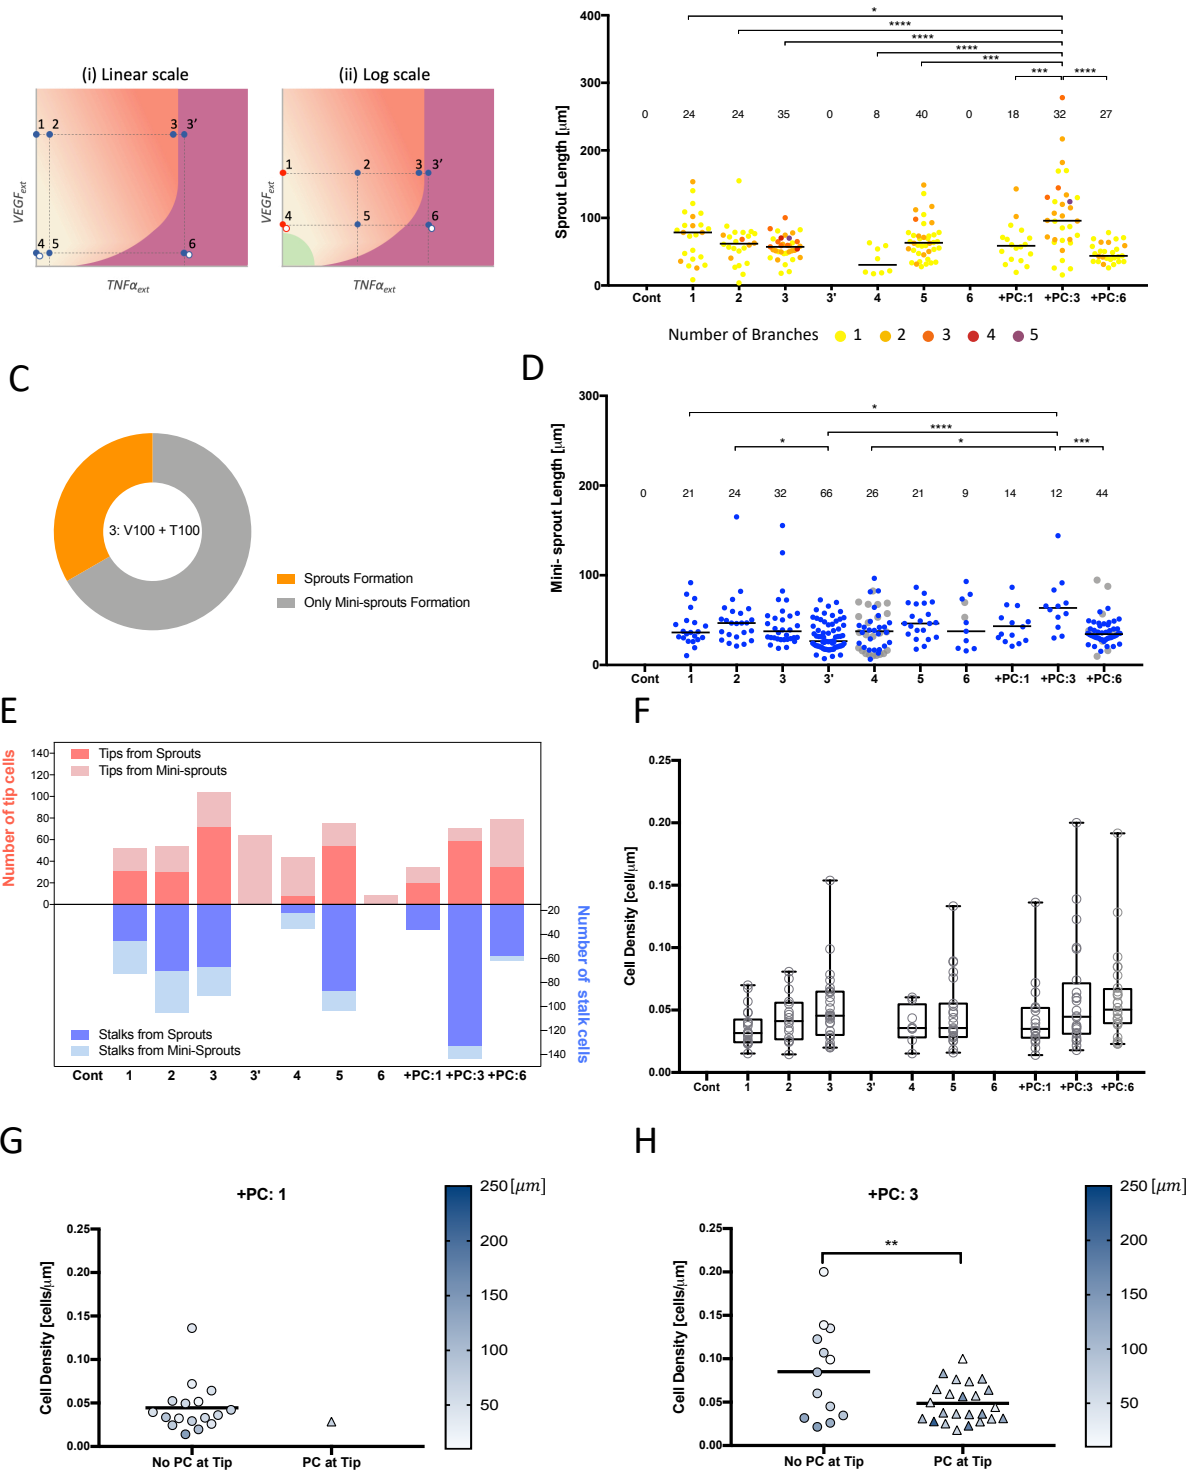

690

691 **Figure 5. Pericytes binding substantially improve the stability of the Tip/Stalk differentiation**

692 **process under inflammation. (A) Conceptual phase diagram of settled Tip-Stalk (T-S) decision**

693 phase (pale orange) and stalled Tip/Stalk-Tip/Stalk (T/S-T/S) decision phase (deep orange)  
694 displayed in linear scale (i) and logarithmic scale (ii). Point 1 and 4 are indicated with red dots in  
695 logarithmic scale due to the zero value of VEGF. Grey dots at point 4 and 6 represent the conditions  
696 presumably corresponding to those in Figure 2. The condition of point 3 and 3' is the same but  
697 they are marked separately according to contradictory outcomes. (B) Quantification of lumenized  
698 sprout formation according to  $\text{TNF}\alpha$  and VEGF concentrations specified in table 1. Color codes  
699 from 1 to 5 of sprouts indicate the number of branches. (C) Two possible and conflicting outcomes  
700 at point 3 from six independent experiments. The data from each experiment is presented in Figures  
701 S10. (D) Quantification of single cell-sized mini-sprouts formation according to  $\text{TNF}\alpha$  and VEGF  
702 concentrations specified in table 1. Data from Figures 2E and F are displayed at 4, 6, +PC:6 with  
703 grey dots. (E) Quantification of the number of leading tip cells and following stalk cells from  
704 newly lumenized sprouts. Escalating TNF levels were initially pro-angiogenic but there was a  
705 complete abrogation of the formation of lumenized sprouts beyond a critical TNF level (point 3'  
706 and point 6). This anti-angiogenic effect of TNF was completely rescued if the experiment was  
707 repeated in the presence of pericytes (+PC:3 and +PC:6). (F) Cell density of tubes which is  
708 calculated by dividing the number of cells consisting a sprout by its length. Increase of cell density  
709 along with  $\text{TNF}\alpha$  level represented the stalk cell growth promoted by  $\text{TNF}\alpha$ , resulting in thicker  
710 sprout formation. Cell density of +PC: 1 condition (G) and +PC: 3 condition (H) which was  
711 separated upon the presence of pericytes at the tip of sprouts. Color scale represents the length of  
712 sprout. Pericytes maintaining physically close contact with tip cells guided endothelial cells to  
713 form longer and thinner sprouts. Sprouts of +PC:6 were too short to differentiate pericytes at tip  
714 and stalk.

715

716 **Table 1. TNF $\alpha$  and VEGF concentration used for angiogenesis assay in 3D vessel on a chip.**

|                         | Cont | 1   | 2   | 3   | 4  | 5  | 6   |
|-------------------------|------|-----|-----|-----|----|----|-----|
| VEGF<br>[ng/ml]         | 0    | 100 | 100 | 100 | 10 | 10 | 10  |
| TNF $\alpha$<br>[ng/ml] | 0    | 0   | 10  | 100 | 0  | 10 | 100 |

717
